# Supplementary material for: Overcoming the trade‐off between grain weight and number in wheat by the ectopic expression of expansin in developing seeds leads to increased yield potential
Source: PubMed Central journal article supplement (PMC8048851; doi:10.1111/nph.17048), 2020-12-04
Supplement: NPH-230-629-s001.pdf [file NPH-230-629-s001.pdf]

## New Phytologist Supporting Information

**Article title:** Overcoming the trade-off between grain weight and number in wheat by the ectopic expression of expansin in developing seeds leads to increased yield potential

**Authors:** Daniel F. Calderini, Francisca M. Castillo, Anita Arenas-M, Gemma Molero, Matthew P. Reynolds, Melanie Craze, Sarah Bowden, Matthew J. Milner, Emma J. Wallington, Adam Dowle, Leonardo D. Gomez and Simon J. McQueen-Mason

Corresponding authors:

Daniel F. Calderini; [danielcalderini@uach.cl](mailto:danielcalderini@uach.cl)

Simon J. McQueen-Mason; [simon.mcqueenmason@york.ac.uk](mailto:simon.mcqueenmason@york.ac.uk)

Article acceptance date: 21 October 2020

The following Supporting Information is available for this article:

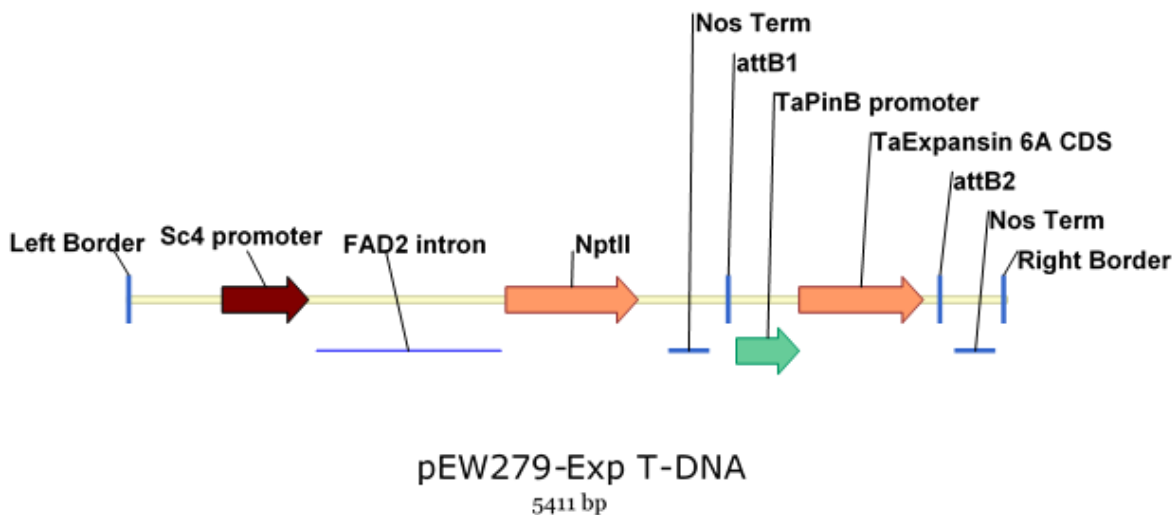

**Fig. S1** Schematic diagram of the binary plasmid pEW279-Exp T-DNA.

**Table S1. Selection criteria of four wheat transgenic lines to perform experiments at low and regular plant density**

| Wheat Lines        | qPCR copy number (T0) | GW G1 (mg) (T2) | GW G2 (mg) (T2) | Yield (T2) | GW at harvest (mg) (T3) | average GW (mg) (T2) greenhouse | Copies_npt2_1 (T1) | Copies_npt2_2 (T2) | Screening of relative expression at 15DAA (T2) |
|--------------------|-----------------------|-----------------|-----------------|------------|-------------------------|---------------------------------|--------------------|--------------------|------------------------------------------------|
| 52.16 (Line 4)     | 4+                    | 62.9            | 66.5            | 240.0      | 57.6                    | 62.5                            | 4                  | 4                  | 11.36                                          |
| 52.4               | 4+                    | 59.6            | 64.4            | 230.7      | 56.2                    | 55.1                            | 5                  | 3                  | 4.21                                           |
| 51.1 (Line 1)      | 4                     | 60.3            | 64.4            | 227.9      | 49.9                    |                                 | 2                  | 2                  | 6.05                                           |
| 51.18              | 4+                    | 59.4            | 62.7            | 220.2      | 56.2                    |                                 | 21                 | 20                 | 14.94                                          |
| 52.1               | 4+                    | 55.7            | 62.3            | 212.6      | 50.2                    |                                 | 4                  | 3                  | 4.66                                           |
| 52.11              | 4+                    | 58.6            | 62.3            | 222.5      | 55.2                    |                                 | 4                  | 3                  | 10.26                                          |
| 52.3 (Line 3)      | 4+                    | 56.0            | 62.1            | 215.9      | 51.8                    |                                 | 6                  | 7                  | 17.10                                          |
| 51.10              | 4                     | 58.2            | 62.1            | 225.4      | 49.5                    |                                 | 2                  | 0                  | 3.58                                           |
| 51.21              | 4+                    | 57.2            | 62.0            | 217.8      | 49.1                    |                                 | 4                  | 7                  | 5.77                                           |
| 52.12              | 4+                    | 56.3            | 61.9            | 217.8      | 52.2                    |                                 | 6                  | 6                  | 14.09                                          |
| 51.20              | 4+                    | 56.7            | 61.7            | 213.4      | 50.8                    |                                 | 5                  | 7                  | 10.86                                          |
| 52.14              | 4+                    | 57.6            | 61.4            | 217.3      | 53.7                    |                                 | 6                  | 8                  | 12.18                                          |
| 52.7               | 4+                    | 56.5            | 60.7            | 214.4      | 48.3                    |                                 | 4                  | 4                  | 15.58                                          |
| 51.14 (Line 2)     | 4+                    | 55.3            | 60.4            | 210.2      | 48.3                    |                                 | 4                  | 8                  | 11.16                                          |
| 51.con 1 (control) | 0                     | 55.8            | 60.2            | 208.8      | 51.3                    | 52.5                            | 0                  | 0                  | 0                                              |
|                    |                       |                 |                 |            |                         |                                 |                    |                    |                                                |
| 52.2               | 4+                    | 55.6            | 60.0            |            | 47.5                    |                                 | 2                  | 2                  |                                                |
| 52.8               | 4+                    | 53.2            | 59.9            |            | 48.7                    |                                 | 4                  | 1                  |                                                |
| 52.15              | 4+                    | 54.3            | 59.9            |            | 51.8                    |                                 | 4                  | 4                  |                                                |
| 51.9               | 4+                    | 58.6            | 59.1            |            | 49.6                    |                                 | 3                  | 3                  |                                                |
| 51.6               | 4                     | 54.6            | 59.1            |            | 48.2                    |                                 |                    |                    |                                                |
| 51.15              | 4+                    | 53.2            | 58.9            |            | 49.1                    |                                 | 15                 | 16                 |                                                |
| 51.12              | 4+                    | 57.8            | 58.7            |            | 48.4                    |                                 | 0                  | 6                  |                                                |
| 52.17              | 4+                    | 52.9            | 58.7            |            | 50.8                    |                                 | 8                  | 4                  |                                                |
| 52.10              | 4+                    | 53.1            | 58.2            |            | 47.4                    |                                 | 0                  | 0                  |                                                |
| 52.13              | 4+                    | 53.4            | 57.1            |            | 48.9                    | 50.0                            | 13                 | nd                 |                                                |

All data are shown as mean of replicates. GW: Grain Weight, DAA: Days after anthesis, nd: not determined.

**Table S2.** Transgene copy number determined by NPTII amplification. nd: not determined

| Wheat line                   | NPTII gene copy number |                      |
|------------------------------|------------------------|----------------------|
|                              | Low density (T3)       | Regular density (T4) |
| 51.1 (Line 1)                | 2                      | 2                    |
| 51.14 (Line 2)               | 6                      | 12                   |
| 52.3 (Line 3)                | 7                      | 10                   |
| 52.16 (Line 4)               | 4                      | 4                    |
| 51.10                        | 2                      |                      |
| 51.12                        | 6                      |                      |
| 51.15                        | 16                     |                      |
| 51.18                        | 21                     |                      |
| 51.2                         | 6                      |                      |
| 51.21                        | 6                      |                      |
| 51.9                         | 3                      |                      |
| 52.1                         | 4                      |                      |
| 52.10                        | 4                      |                      |
| 52.11                        | 4                      |                      |
| 52.12                        | 4                      |                      |
| 52.14                        | 7                      |                      |
| 52.15                        | 4                      |                      |
| 52.17                        | 6                      |                      |
| 52.2                         | 2                      |                      |
| 52.4                         | 4                      |                      |
| 52.7                         | 4                      |                      |
| 52.8                         | 3                      |                      |
| 52.13                        | 13                     |                      |
| 51.6                         | nd                     |                      |
| <b>51.con1<br/>(control)</b> | <b>0</b>               | <b>0</b>             |

**Table S3. Phenology of transgenic wheat lines and control in both experiments. Dates of anthesis and physiological maturity (PM).**

| <b>Low density Experiment</b> |          |        |
|-------------------------------|----------|--------|
| wheat line                    | Anthesis | PM     |
| Control                       | 28-nov   | 12-ene |
| Line 1                        | 28-nov   | 12-ene |
| Line 2                        | 28-nov   | 12-ene |
| Line 3                        | 28-nov   | 12-ene |
| Line 4                        | 27-nov   | 11-ene |
| <i>ANOVA<br/>P value</i>      | 0.832    | 0.772  |

| <b>Regular Density Experiment</b> |          |        |
|-----------------------------------|----------|--------|
| wheat line                        | Anthesis | PM     |
| Control                           | 26-nov   | 17-ene |
| Line 1                            | 26-nov   | 18-ene |
| Line 2                            | 26-nov   | 17-ene |
| Line 3                            | 26-nov   | 17-ene |
| Line 4                            | 26-nov   | 17-ene |
| <i>ANOVA<br/>P value</i>          | 0.978    | 0.941  |

**Table S4. Plant height of transgenic wheat lines and control in both experiments.**

**Low density Experiment**

| Wheat Lines            | Plant height (m) |      |
|------------------------|------------------|------|
|                        | Mean             | SEM  |
| <b>Line 4</b>          | 0.90 ***         | 0.01 |
| <b>Line 1</b>          | 0.86 **          | 0.02 |
| <b>Line 2</b>          | 0.83 <i>ns</i>   | 0.01 |
| <b>Line 3</b>          | 0.84 <i>ns</i>   | 0.02 |
| <b>Control</b>         | 0.81             | 0.03 |
| <i>ANOVA (P value)</i> | 0.029<br>**      |      |

**Regular density Experiment**

| Wheat Lines            | Plant height (m) |      |
|------------------------|------------------|------|
|                        | Mean             | SEM  |
| <b>Line 4</b>          | 0.92 ***         | 0.00 |
| <b>Line 1</b>          | 0.85 <i>ns</i>   | 0.03 |
| <b>Line 2</b>          | 0.85 <i>ns</i>   | 0.01 |
| <b>Line 3</b>          | 0.85 <i>ns</i>   | 0.01 |
| <b>Control</b>         | 0.86             | 0.01 |
| <i>ANOVA (P value)</i> | 0.017<br>**      |      |

All data are shown as mean and standard error (SEM).

The phenotype data of each line was compared to control using the Fisher LSD test post-hoc; asterisks indicate significant effects at  $p < 0.10$  (\*);  $p < 0.05$  (\*\*);  $p < 0.01$  (\*\*\*);  $p < 0.001$  (\*\*\*\*); *ns*: not significant. ANOVA *P-value* is shown at the bottom of the table.

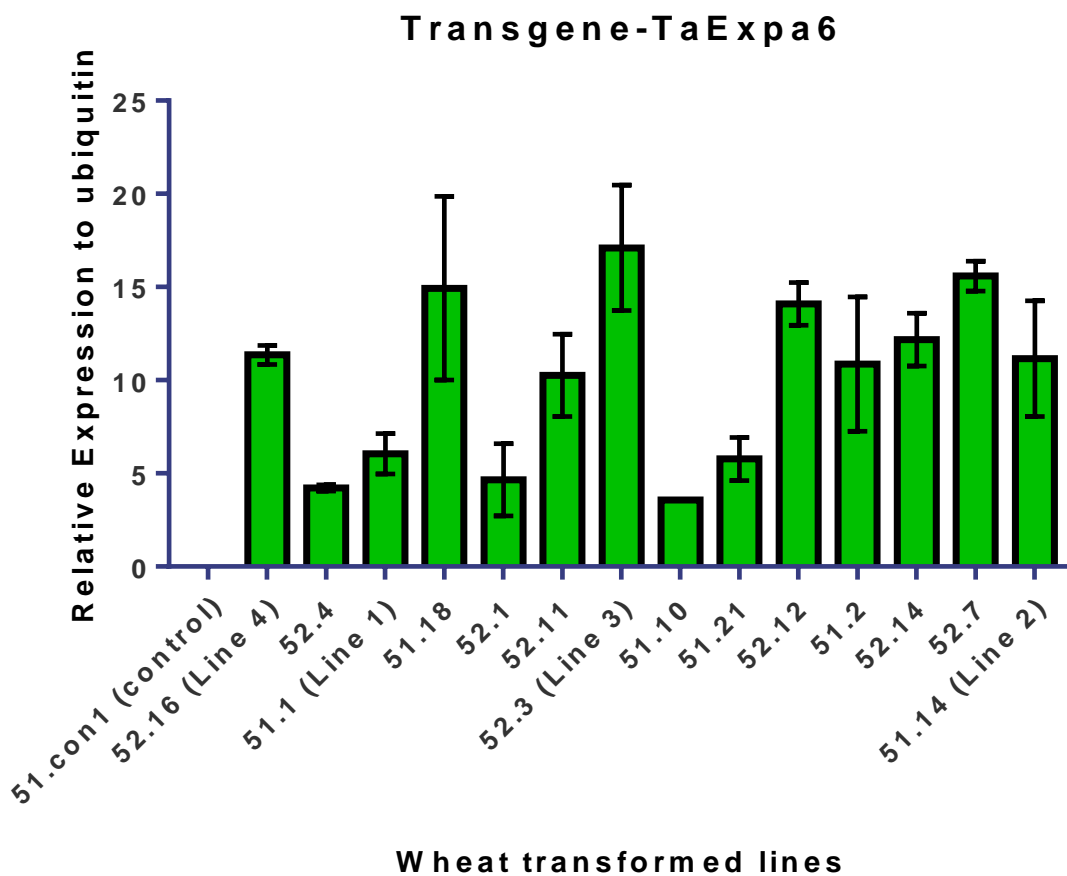

**Fig. S2.** Screening of relative expression of transgene in 15 wheat transgenic lines at T2 generation. All data are shown as mean and standard error.

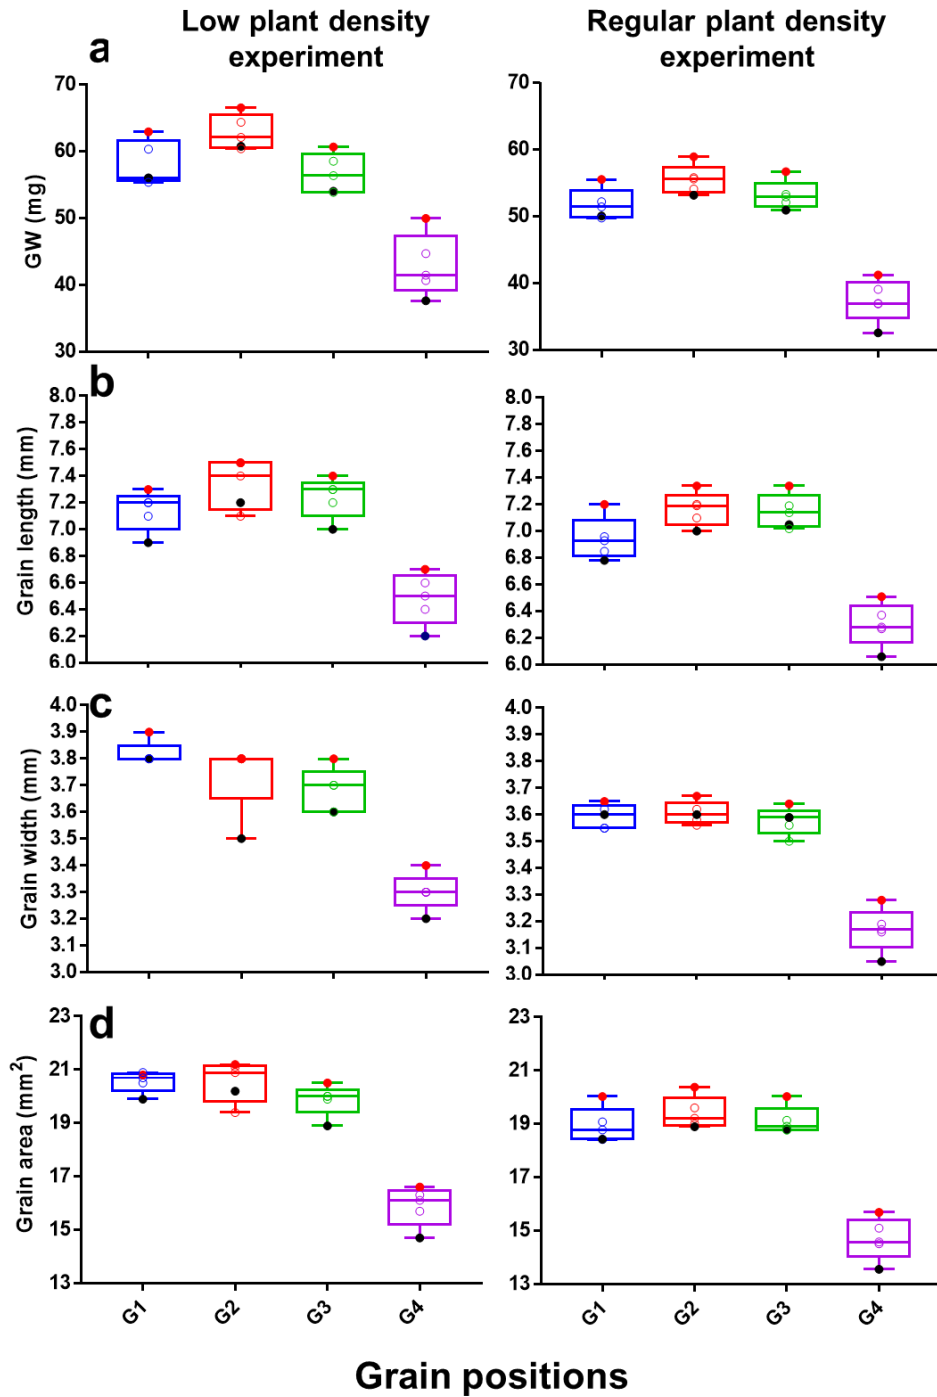

**Fig. S3.** Box and whiskers showing a) grain weight, b) grain length, c) grain width and d) grain area across grain positions (G1-G4) in control line and transgenic lines (1-4). In each graph the control line was identified with a black point and line 4 with a red point, open circles correspond to the wheat transgenic lines 1, 2 and 3. The horizontal lines in the box plots represent the minimum, 25th percentile, median, 75th percentile, and maximum values across the wheat transgenic lines and control line.
